# Supplementary material
Source: PubMed Central journal article supplement (PMC3204930)
Supplement: NIHMS332351-supplement-Supplement.pdf [file NIHMS332351-supplement-Supplement.pdf]

## SUPPLEMENTARY MATERIAL

### Supplementary Methods

### Supplementary clinical information

### Supplementary Figures 1, 2, 3, 4, 5

### Supplementary Tables 1, 2

## Truncating Mutations in NRXN2 and NRXN1 in Autism Spectrum Disorders and Schizophrenia

Julie Gauthier<sup>1\*</sup>, Tabrez J. Siddiqui<sup>2\*</sup>, Peng Huashan<sup>3</sup>, Daisaku Yokomaku<sup>2</sup>, Fadi F. Hamdan<sup>4</sup>, Nathalie Champagne<sup>5</sup>, Mathieu Lapointe<sup>5</sup>, Dan Spiegelman<sup>1</sup>, Anne Noreau<sup>1</sup>, Ron G. Lafrenière<sup>1</sup>, Ferid Fathalli<sup>6</sup>, Ridha Joober<sup>6</sup>, Marie-Odile Krebs<sup>7</sup>, Lynn E. DeLisi<sup>8</sup>, Laurent Mottron<sup>9</sup>, Éric Fombonne<sup>10</sup>, Jacques L. Michaud<sup>4</sup>, Pierre Drapeau<sup>5</sup>, Salvatore Carbonetto<sup>3</sup>, Ann Marie Craig<sup>2§</sup>, Guy A. Rouleau<sup>1§</sup>

\*JG and TJS contributed equally

<sup>1</sup>From the Centre of Excellence in Neuromics of Université de Montréal, Centre Hospitalier de l'Université de Montréal, and Department of Medicine, Université of Montréal. <sup>2</sup>Brain Research Centre and Department of Psychiatry, University of British Columbia, 2211 Wesbrook Mall, Vancouver BC, Canada V6T 2B5. <sup>3</sup>McGill University Department of Physiology, Montreal, Centre for Research in Neuroscience, McGill University Health Centre, Montreal General Hospital, 1650 Cedar Avenue, Montreal, (QC), H3G 1A4. <sup>4</sup>Centre of Excellence in Neuromics of Université de Montréal, CHU Sainte-Justine Research Center, Montreal, (QC), Canada, 3175, Côte Ste-Catherine, 6th Floor, Bloc 7, H3T 1C5. <sup>5</sup>Department of Pathology and Cell Biology, and Le Groupe de Recherche sur le Système Nerveux Central, Université de Montréal. <sup>6</sup>Douglas Mental Health University Institute, Department of Psychiatry, McGill University, Pavilion Frank B. Common, Rm. F-2142, 6875 LaSalle Blvd., Verdun, Montreal, (QC), Canada, H4H 1R3. <sup>7</sup>University Paris Descartes, Laboratory of Pathophysiology of Psychiatric Diseases, U894, Sainte-Anne Hospital, 7 rue Cabanis 75014 Paris, Paris, France. <sup>8</sup>Harvard Medical School, VA Boston Healthcare Service, Brockton, Massachusetts USA. <sup>9</sup>Pervasive Developmental Disorders Specialized Clinic, Rivière-des-Prairies Hospital, University of Montreal, Montreal, QC, H1E 1A4, Canada. <sup>10</sup>Department of Psychiatry, Montreal Children's Hospital, Montreal, QC, H3Z 1P2, Canada.

Corresponding authors:

Guy A. Rouleau, MD, PhD, FRCPC, OQ, CHUM Research Centre, 2099, Alexandre De-Seve Street, Room Y-3633, Montreal, Quebec, Canada H2L 2W5, Tel: 514-890-8000 x 24699, Fax: 514-412-7602, Email: guy.rouleau@umontreal.ca.

Ann Marie Craig, PhD, Brain Research Centre, Koerner Pavillion Room F149, University of British Columbia, 2211 Wesbrook Mall, Vancouver BC, Canada V6T 2B5, E-mail amcraig@interchange.ubc.ca

## Supplementary Methods

*DNA constructs.* The full-length human NRXN1 $\alpha$  cDNA (BC150247, IMAGE:9007472) was obtained from Open Biosystems (Huntsville, AL, Canada). The wild-type (WT) was cloned into pcGlobin2 (Ro et al. 2004). The insACGG mutation was generated by site-directed mutagenesis (Stratagene) and confirmed by sequencing. A FLAG sequence (DYKDDDDK) was inserted just after the signal peptide (between amino acids 33 and 34). Mouse neurexin2 $\alpha$ (-S4)-CFP cloned into Clontech ECFP-N1 vector and YFP-LRRTM2 cloned into pLentiLox3.7 vector have been described previously (Siddiqui et al. 2010). Neurexin2 $\alpha$ (-S4)delA was generated from neurexin2 $\alpha$ (-S4)-CFP by PCR cloning. Rodent HA-neurexin1 $\alpha$ (-S4)-CFP expressing the N-terminal 320 aa of rat neurexin fused to the C-terminal 1176 aa of mouse neurexin (Kang et al. 2008) was generated from neurexin1 $\alpha$ (-S4)-CFP (Siddiqui et al. 2010) by the overlap PCR method. Rodent HA-neurexin1 $\alpha$ (-S4)-CFP H8P, E715K, R813C and InsertACGG were generated from HA-neurexin1 $\alpha$ (-S4)-CFP by the overlap PCR method. LRRTM2-alkaline phosphatase (AP) has been described previously (Linhoff et al. 2009). Neuroligin2-Fc was generated by cloning the mature mouse neuroligin2 ectodomain between mouse neurexin1 $\beta$  signal peptide and human Ig Fc domain in a pCDNA4-based vector.

*Copy number variant analysis.* Whole genome copy number variant analysis on the ASD patients and their parents was performed using the Affymetrix Genome-Wide Human SNP Array 5.0 (Affymetrix, Santa Clara, CA, USA). The Affymetrix 5.0 chip contains all 500,568 single nucleotide polymorphisms (SNPs) from the two-array Mapping 500K Array Set as well as an additional 420,000 non-polymorphic probes that can measure other genetic differences, such as copy number variation. SNPs on the array are present on 200 to 1,100 base pair (bp) Nsp I or StyI digested fragments in the human genome. As per the manufacturer's specifications, two separate tubes, containing 250ng of genomic DNA each, were digested with StyI, and NspI (New England BioLabs, Ipswich, MA, USA), respectively. After restriction enzyme digestion, adaptors supplied by the manufacturer were ligated onto the products of the previous reactions and PCR amplification was performed according to the Affymetrix Genome-

Gauthier et al.

Wide Human SNP Array 5.0 instructions. The amplified products were pooled and purified with magnetic beads (Agencourt, Beverly, MA). Using reagents supplied by the manufacturer, the purified PCR products were fragmented, end-labeled and hybridized to the Affymetrix 5.0 chip. R-phycoerythrin streptavidin conjugate (Invitrogen, Carlsbad, CA, USA) and antistreptavidin-antibodies (Vector Labs, Burlingame, CA, USA) were used according to the manufacturer's instructions for fluorescence detection. Finally, the chips were scanned on the Affymetrix GeneChip® 3000 Scanner 7G (Affymetrix, Santa Clara, CA). Data analysis was performed using the Chromosome Analysis Suite v1.0 (Affymetrix, Santa Clara, CA). The NSID patients were similarly tested for CNVs using either the Affy 6.0 SNP chip (as described for the Affy 5.0), or by array CGH using a NimbleGen 135K oligo array (done on a clinical basis at the Sainte Justine Hospital, Montreal, Quebec).

*Cell culture.* Dissociated primary hippocampal neuron cultures were prepared from embryonic day 18 rat embryos essentially as described previously (Goslin et al. 1998; Kaech and Banker 2006). Neurons were plated at a final density of 300,000 cells per dish on poly-L-lysine-coated coverslips in 60 mm culture dishes inverted over a feeder layer of glia. After 2 d, cytosine arabinoside (5  $\mu$ M) was added to neuron cultures to prevent the overgrowth of glia. For surface expression, neurons were transfected with human Flag-neurexin1 $\alpha$  expression plasmids at day *in vitro* (DIV) 0 using electroporation (AMAXA Biosystems) and analysed for surface Flag at 2-5 DIV. For fibroblast-neuron cocultures to assay LRRTM2, neurons were transfected with 4  $\mu$ g of YFP-LRRTM2 DNA at DIV 0 by electroporation and seeded at a density of 500,000 to 1 million per 60 mm dish. COS7 and human embryonic kidney 293T (HEK293T) cells were cultured in DMEM-H supplemented with 10% fetal bovine serum. HEK293T and COS7 cells were transfected using Fugene 6 (Roche). Cocultures of COS7 cells with neurons were performed as described previously (Graf et al. 2004). Essentially, COS7 cells were harvested by trypsinization 18 to 24 h after transfection, seeded onto neuron coverslips pre-grown for 9–11 DIV, supplemented with 100  $\mu$ M APV (Research Biochemicals) to limit toxicity, and fixed 20–24 h later.

*Surface expression.* To determine surface expression, Flag- or HA-neurexin-CFP variants were transfected into COS7 cells, incubated live with anti-Flag or anti-HA antibody for 30 min at room temperature (RT), then fixed in prewarmed 4% formaldehyde/4% sucrose, blocked in 10% BSA in PBS and incubated with Alexa-568-conjugated anti-mouse antibody to detect surface Flag or HA. CFP signal represents total expression level for the missense variants. Truncation mutants were co-transfected with CFP to identify transfected cells. Intracellular expression of Flag-neurexin1 $\alpha$  insACGG in COS7 cells was confirmed by incubation with anti-Flag and secondary antibodies after fixing cells and permeabilizing with 0.25% Triton for 5 min. Neurons labeled for surface Flag were permeabilized and co-stained for F-actin with coumarin phalloidin. For the double labeling with surface HA versus permeabilized HA, HA-neurexin1 $\alpha$ -CFP or HA-neurexin1 $\alpha$  insACGG-CFP were transfected into COS7, surfaced labelled with rat anti-HA antibody, fixed and permeabilised, then incubated with mouse anti-HA antibody and then species-specific secondary antibodies.

*Western blots.* COS7 cells grown in 6 cm tissue culture dishes were transfected with 2.5  $\mu$ g of plasmid DNA. Twenty-four hours after transfection, the culture media was changed to serum-free DMEM, which was collected after twenty-four hours with addition of protease-inhibitor cocktail (Complete, EDTA-free, Roche). Debris was removed by centrifuging at 10,000g for 10 min, and culture media was then concentrated to a final volume of 100  $\mu$ l (3KDa molecular weight cut-off, Amicon). Cells were washed twice with cold-PBS, lysed in 300  $\mu$ l of lysis buffer (1% SDS, 10 mM Tris pH7.5, 5 mM EDTA and 1 mM PMSF) and immediately boiled for 3 min to inactivate proteases. Total protein amounts in lysate and concentrated media were measured by the DC Protein Assay (Biorad). 15  $\mu$ g of lysate and 30  $\mu$ g of media (~30  $\mu$ l corresponding to a third of the total media) were electrophoresed in an 8% SDS-PAGE and subsequently blotted onto PVDF membrane (Millipore). The primary antibody used was anti-Flag M2 antibody (Sigma) and the secondary antibody was HRP-conjugated anti-mouse antibody (Southern Biotech). The blots were developed by chemiluminescent HRP substrate Immobilon Western (Millipore) and imaged with a VersaDoc System (Biorad).

*Protein binding assays.* Expression of the LRRTM2-AP tagged fusion protein or neuroligin2-Fc tagged fusion protein was performed by transient transfection in HEK293T cells essentially as described previously (Siddiqui et al. 2010). Supernatant collected from protein expressing cells was concentrated using Centricon Plus-70 ultrafiltration units (30 kDa cutoff; Millipore). LRRTM2-AP fusion protein also contained Myc and His tags and was purified using Ni-NTA agarose eluting with 200 mM imidazole. Imidazole was removed by overnight dialysis (Spectrapor). Purified LRRTM2-AP fusion protein was quantitated by SDS-PAGE relative to a BSA standard curve using Sypro Ruby gel stain (Invitrogen), UV illumination, and a Bio-Rad gel documentation system. Neuroligin2-Fc fusion protein was purified with protein G (Pierce) beads and eluted in fractions. Purified neuroligin2-Fc protein was quantitated by the RC DC Protein Assay (Bio-Rad).

To determine LRRTM2-AP binding to neurexin variants, transfected cells were incubated with the fusion protein live for 1 h at RT followed by anti-Myc and/or anti-HA antibodies for 30 min. Binding assays were done in buffer: 168 mM NaCl, 2.6 mM KCl, 10 mM HEPES, pH 7.2, 2 mM CaCl<sub>2</sub>, 2 mM MgCl<sub>2</sub>, 10 mM D-glucose, and 100 µg/ml BSA. Cells were then fixed in prewarmed 4% formaldehyde/4% sucrose, blocked in 10% BSA in PBS, and incubated with Alexa-568-conjugated anti-IgG1 to detect bound Myc and Alexa 488-conjugated anti-IgG2b to detect expressed HA.

To determine neuroligin2-Fc fusion protein binding to neurexin variants, transfected cells were co incubated with fusion protein and anti-HA antibody for 30 min at RT . Cells were then fixed in prewarmed 4% formaldehyde/4% sucrose, blocked in 10% BSA in PBS, and incubated with FITC-conjugated anti-human IgG to detect bound neuroligin2-Fc and/or with Alexa-568-conjugated anti-mouse antibody to detect surface HA.

*Immunocytochemistry.* COS7 cells and cocultures were fixed for 12–15 min with warm 4% formaldehyde and 4% sucrose in PBS, pH 7.4, followed by permeabilization with PBST (PBS plus 0.25% Triton X-100). Fixed and permeabilized cultures were blocked in 10% BSA in PBS for 30 min at 37°C and primary antibodies applied in 3% BSA in PBS. After overnight incubation at room temperature, the coverslips were washed with PBS and incubated in secondary antibodies in 3% BSA in

PBS for 1 h at 37°C. The coverslips were then washed and mounted in elvanol (Tris-HCl, glycerol, and polyvinyl alcohol, with 2% 1,4-diazabicyclo[2,2,2]octane).

The following primary antibodies were used: affinity purified rabbit anti-neurologin2 antibody (Graf et al. 2006), rabbit anti-synapsin I (1:2000; Millipore; AB1543P), mouse anti-PSD-95 family (IgG2a; 1:500; clone 6G6-1C9; Thermo Scientific), mouse anti-gephyrin (IgG1; 1:1000; MAb7a; Synaptic Systems). For labeling dendrites, we used anti-MAP2 (chicken polyclonal IgY; 1:2000; Abcam; ab5392). To determine surface localization of N-terminally Flag- or HA-tagged proteins, live staining was performed using mouse anti-Flag (IgG1, 1:100; M2; Sigma) or rat anti-HA antibody 3F10 (Roche) or mouse anti-HA (IgG2b, 1:500; Roche 12CA5). Labeled secondary antibodies used were raised in goat against the appropriate species and monoclonal isotype, highly cross-adsorbed, and conjugated to Alexa-488, Alexa-568, and Alexa-647 dyes (1:500; Invitrogen) or Dylight 594 (1:500; Jackson ImmunoResearch). To visualize dendrites, we used AMCA (7-amino-4methylcoumarin-3-acetic acid)-conjugated anti-chicken IgY (donkey IgG; 1:200; Jackson ImmunoResearch; 703-155-155). Recombinant proteins tagged with human IgG Fc domain were stained with FITC-conjugated donkey anti-human IgG (L+H) (1:150 in live staining; Jackson ImmunoResearch).

*Image analysis.* Images were acquired on a Zeiss Axioplan2 microscope with a 63x 1.4 numerical aperture oil objective and Photometrics Sensys cooled CCD camera using MetaMorph imaging software (Molecular Devices) and customized filter sets. Images were acquired as grayscale and prepared for presentation using Adobe Photoshop (Adobe Systems). For quantitation, experimental sets were fixed and stained simultaneously and imaged with identical settings. All imaging and analysis were done blind, choosing similar fields among conditions by phase contrast and the transfected protein channel. Analysis was performed using MetaMorph (Molecular Devices), Kaleidagraph (Synergy Software), and InStat3 Graph (GraphPad Software).

To determine surface expression of missense HA-neurexin-CFP proteins, cells were chosen by CFP expression, regions were generated around the perimeter of each cell, then the average gray value of CFP signal, representing total expression and HA signal, representing surface expressed protein

were measured with each region. The average gray value of the off-cell background were subtracted from the average gray values of CFP and HA signals to give the corrected gray values. For the truncation variant which removes the CFP tag, the surface HA signal was reported, not normalized to co-transfected CFP. To determine the binding affinity of soluble proteins to surface-expressed proteins, regions were generated around the exact perimeter of each cell, and the average gray values of bound protein and expressed surface protein were measured within the region. The average gray value of the off-cell background was subtracted, and the corrected average gray values of bound protein and expressed surface protein were measured. For coculture scoring, coverslips were blinded and contacts between expressing neurons and CFP-positive COS7 cells counted. Neurons expressing similar levels of YFP-LRRTM2 in the soma were chosen; note that co-culture with synaptogenic proteins sometimes reduced the levels of YFP-LRRTM2 at endogenous synapses of contacted dendrites. Clustering of the expressed YFP-LRRTM2 or neuroligin2, detected by its antibody in dendrites contacting expressing COS7 cells but absent for pre-synaptic marker synapsin or VGAT was counted as positive, whereas no clustering was counted as negative.

### **Supplementary clinical information**

*Patient with the NRXN1 c.4205insACGG mutation.* A female diagnosed with disorganized type SCZ. At the age of 17, she developed auditory hallucinations, delusional perceptions, bizarre behaviour and incoherence. During her first hospitalization, organic causes of the psychotic disorders were ruled out and she was diagnosed as having disorganized schizophrenia. She was treated with clozapine (100mg), but the efficacy of the medication was limited. Her schizophrenic positive and negative symptoms progressively worsened over the years and she underwent many hospitalisations. During her illness, she did not manifest any mood disorders or suicidal behaviour and there was no history of alcohol or drug abuse. At the age of 24 years old, she was enrolled in this study. At that time, she was hearing many voices. Her speech was poor, digressive and incoherent. Apathy, mannerisms, blunted affect and the feeling of depersonalisation complete the clinical picture of undifferentiated schizophrenia.

*Patient with the NRXN2 c.2853delT mutation.* This boy, diagnosed with autistic disorder, has some allergies to benzocaine. He is not on any medications and eats well and is sleeping well. He has soft bowel movements. He had a febrile convulsion when he was 14 months but no further problems. He does not have any skin markings and somewhat small ears but no other minor anomalies. He was delivered by a vaginal vertex delivery and his Apgar's score were 8 and 9. He was noted to have a fast heart rate with possible sepsis and IV antibiotics were given. His developmental milestones were as follows: he sat alone at six months and walked at 13 months. At 10 or 11 months he said Mama and was babbling but words only appeared when he was 2 years 8 months, when he said ball. At the age of 3 years 2 months he did not have any phrase speech.

### **Supplementary References**

- Goslin K, Asmussen H, Banker G (1998) Rat hippocampal neurons in low-density culture. In: Banker G, Goslin K (eds) *Culturing Nerve Cells*, 2nd edn. MIT Press, Cambridge, pp 339-370
- Graf ER, Kang Y, Hauner AM, Craig AM (2006) Structure function and splice site analysis of the synaptogenic activity of the neurexin-1 beta LNS domain. *J Neurosci* 26: 4256-65.
- Graf ER, Zhang X, Jin SX, Linhoff MW, Craig AM (2004) Neurexins induce differentiation of GABA and glutamate postsynaptic specializations via neuroligins. *Cell* 119: 1013-26.
- Kaech S, Banker G (2006) Culturing hippocampal neurons. *Nat Protoc* 1: 2406-15.
- Kang Y, Zhang X, Dobie F, Wu H, Craig AM (2008) Induction of GABAergic postsynaptic differentiation by alpha-neurexins. *J Biol Chem* 283: 2323-34.
- Linhoff MW, Lauren J, Cassidy RM, Dobie FA, Takahashi H, Nygaard HB, Airaksinen MS, Strittmatter SM, Craig AM (2009) An unbiased expression screen for synaptogenic proteins identifies the LRRTM protein family as synaptic organizers. *Neuron* 61: 734-49.
- Ro H, Soun K, Kim EJ, Rhee M (2004) Novel vector systems optimized for injecting in vitro-synthesized mRNA into zebrafish embryos. *Mol Cells* 17: 373-6.
- Siddiqui TJ, Pancaroglu R, Kang Y, Rooyackers A, Craig AM (2010) LRRTMs and neuroligins bind neurexins with a differential code to cooperate in glutamate synapse development. *J Neurosci* 30: 7495-506.



Supplementary Figure 1

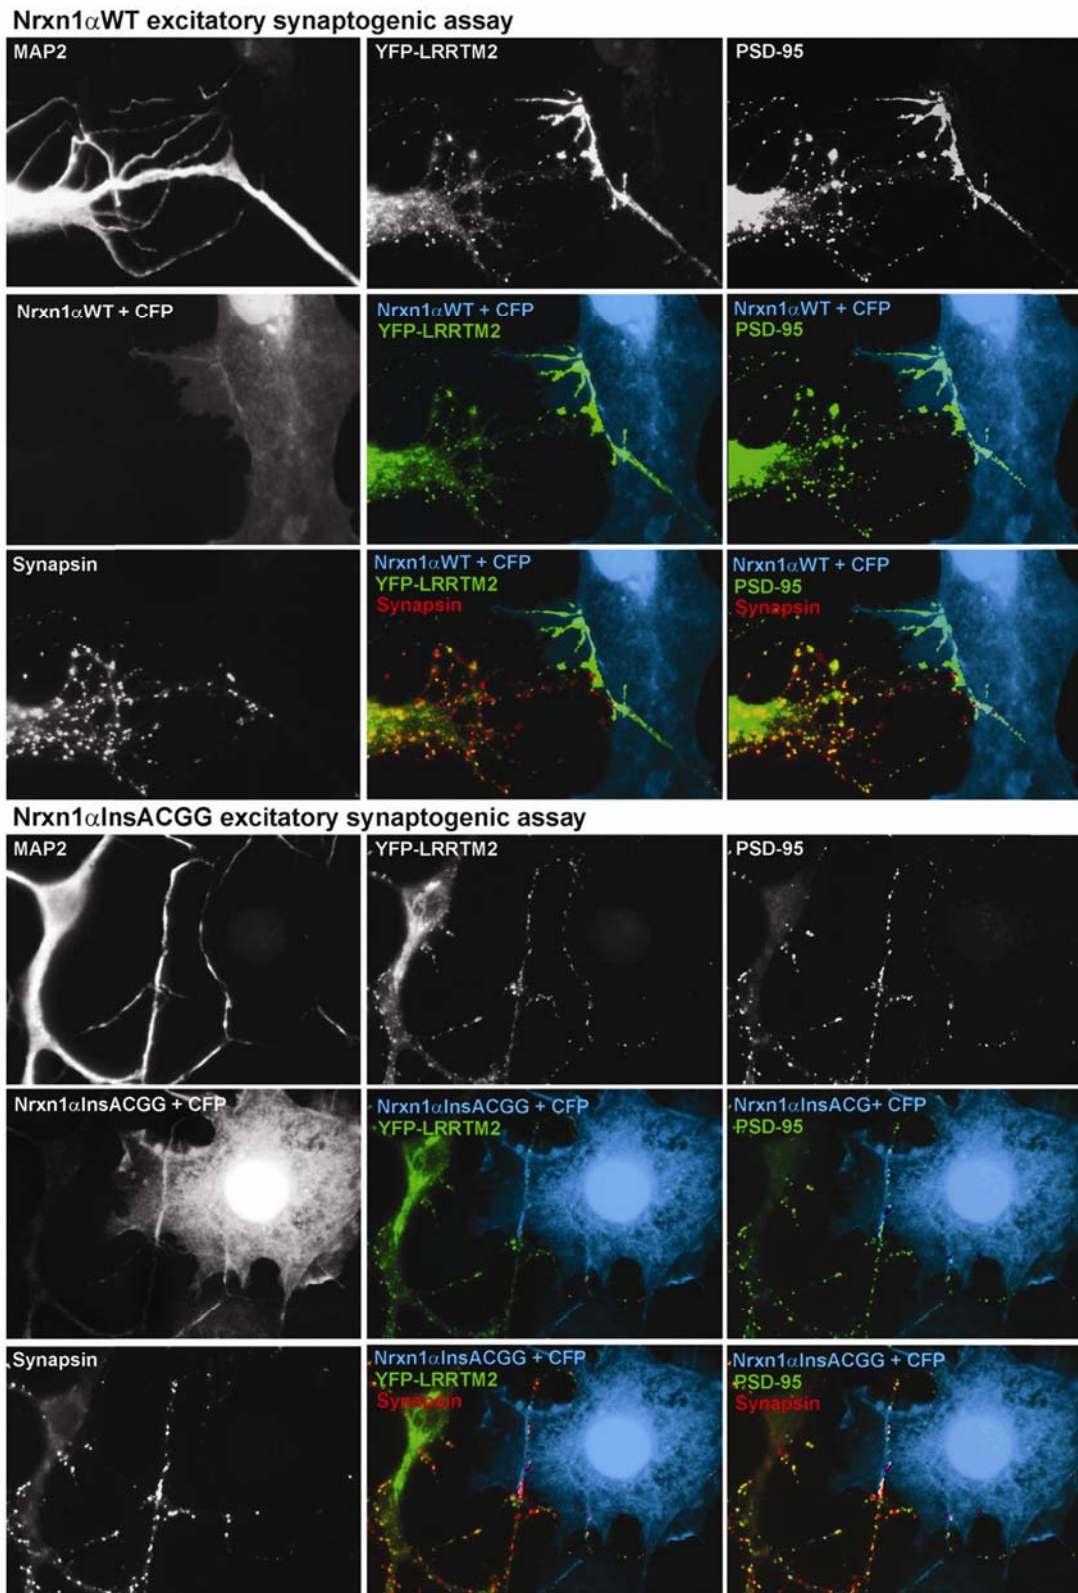

**Supplementary Figure 1.** NRXN1 c.4205insACGG results in functional deficiency in excitatory synaptogenic activity in neuron coculture assays. COS cells were transfected with HA-neurexin1 $\alpha$ -CFP vectors and CFP to mark the transfected cells and cocultured with rat hippocampal neurons transfected with YFP-LRRTM2. CFP-positive cells cotransfected for HA-neurexin1 $\alpha$ -CFP wild type (**top**) induced clustering of YFP-LRRTM2 and endogenous PSD-95 at contact sites with transfected neuron dendrites. Induced clusters were distinguished from endogenous synapses by the absence of synapsin. In contrast, in spite of equal contact of the CFP-positive cotransfected cells with MAP2-positive dendrites, the insACGG mutant (**bottom**) failed to induce clustering of either glutamatergic postsynaptic component. Only synapsin-positive clusters of YFP-LRRTM2 and PSD-95 were seen corresponding to endogenous synapses.

**Supplementary Figure 2 (below).** NRXN1 c.4205insACGG results in functional deficiency in inhibitory synaptogenic activity in neuron coculture assays. CFP-positive cells cotransfected for HA-neurexin1 $\alpha$ -CFP wild type (**top**) and cocultured with hippocampal neurons induced clustering of endogenous NLGN2 and gephyrin at contact sites with neuron processes. Induced clusters were distinguished from endogenous synapses by the absence of VGAT. In contrast, the insACGG mutant (**bottom**) failed to induce clustering of either GABAergic postsynaptic component. Only VGAT-positive clusters of NLGN2 and gephyrin were seen corresponding to endogenous synapses.

Supplementary Figure 2

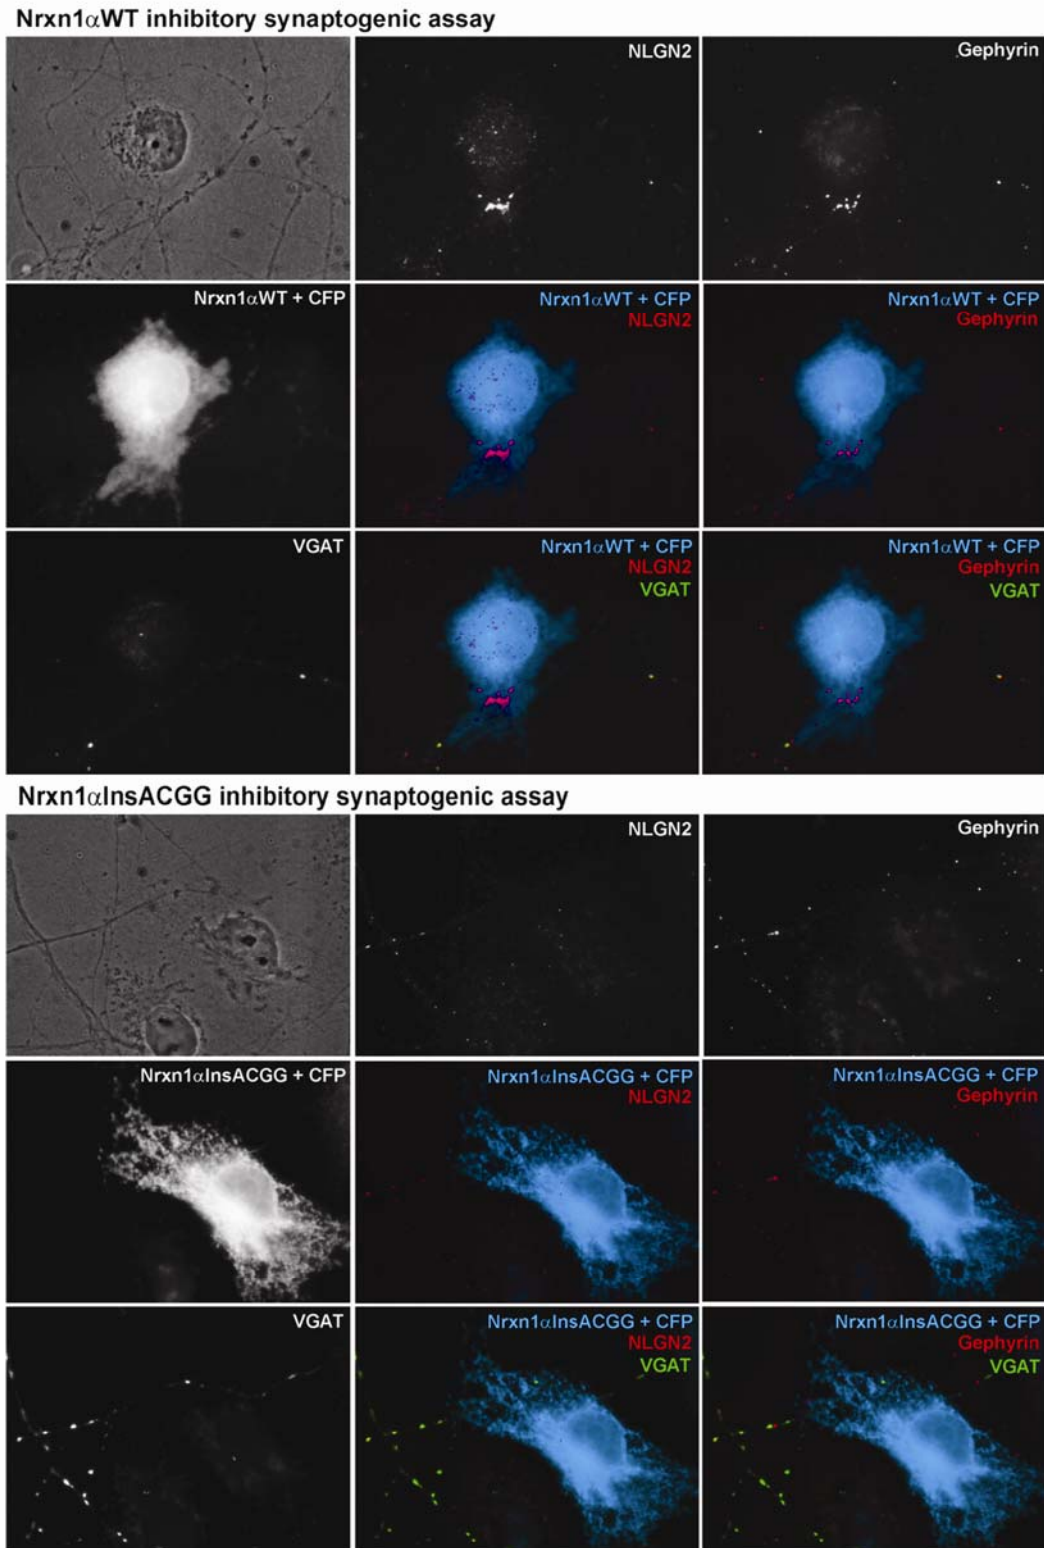

**Supplementary Figure 3****Nrxn2 $\alpha$ WT excitatory synaptogenic assay**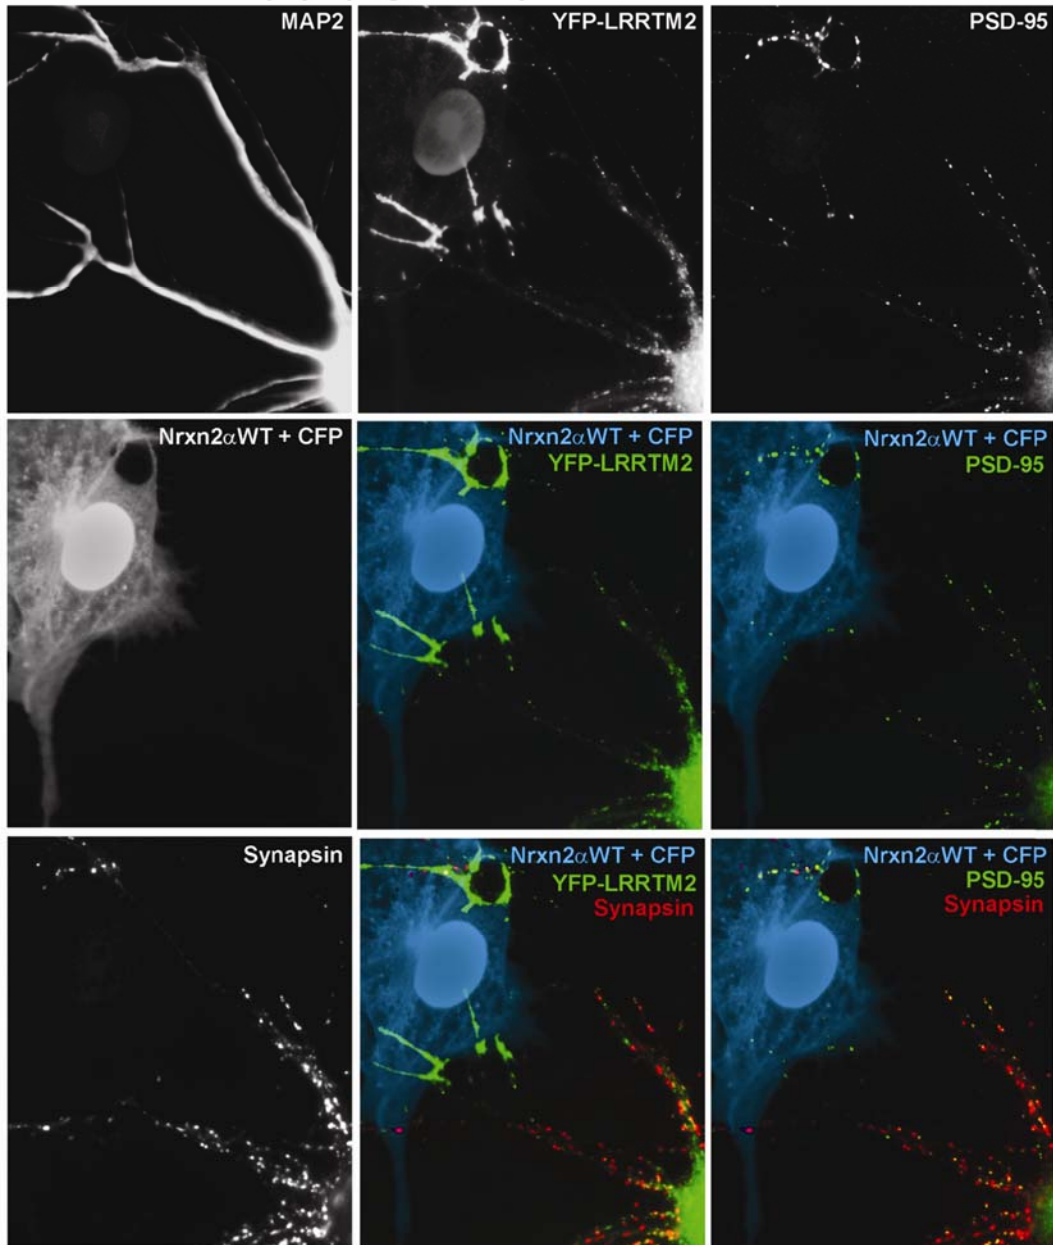

**Supplementary Figure 3.** NRXN2 exhibits excitatory synaptogenic activity in neuron coculture assays. COS cells were transfected with neurexin2 $\alpha$ -CFP wild type and CFP to mark the transfected cells and cocultured with rat hippocampal neurons transfected with YFP-LRRTM2. CFP-positive cells cotransfected for neurexin2 $\alpha$ -CFP induced clustering of YFP-LRRTM2 and endogenous PSD-95 at contact sites with transfected neuron dendrites. Induced clusters were distinguished from endogenous synapses by the absence of synapsin.

## Supplementary Figure 4

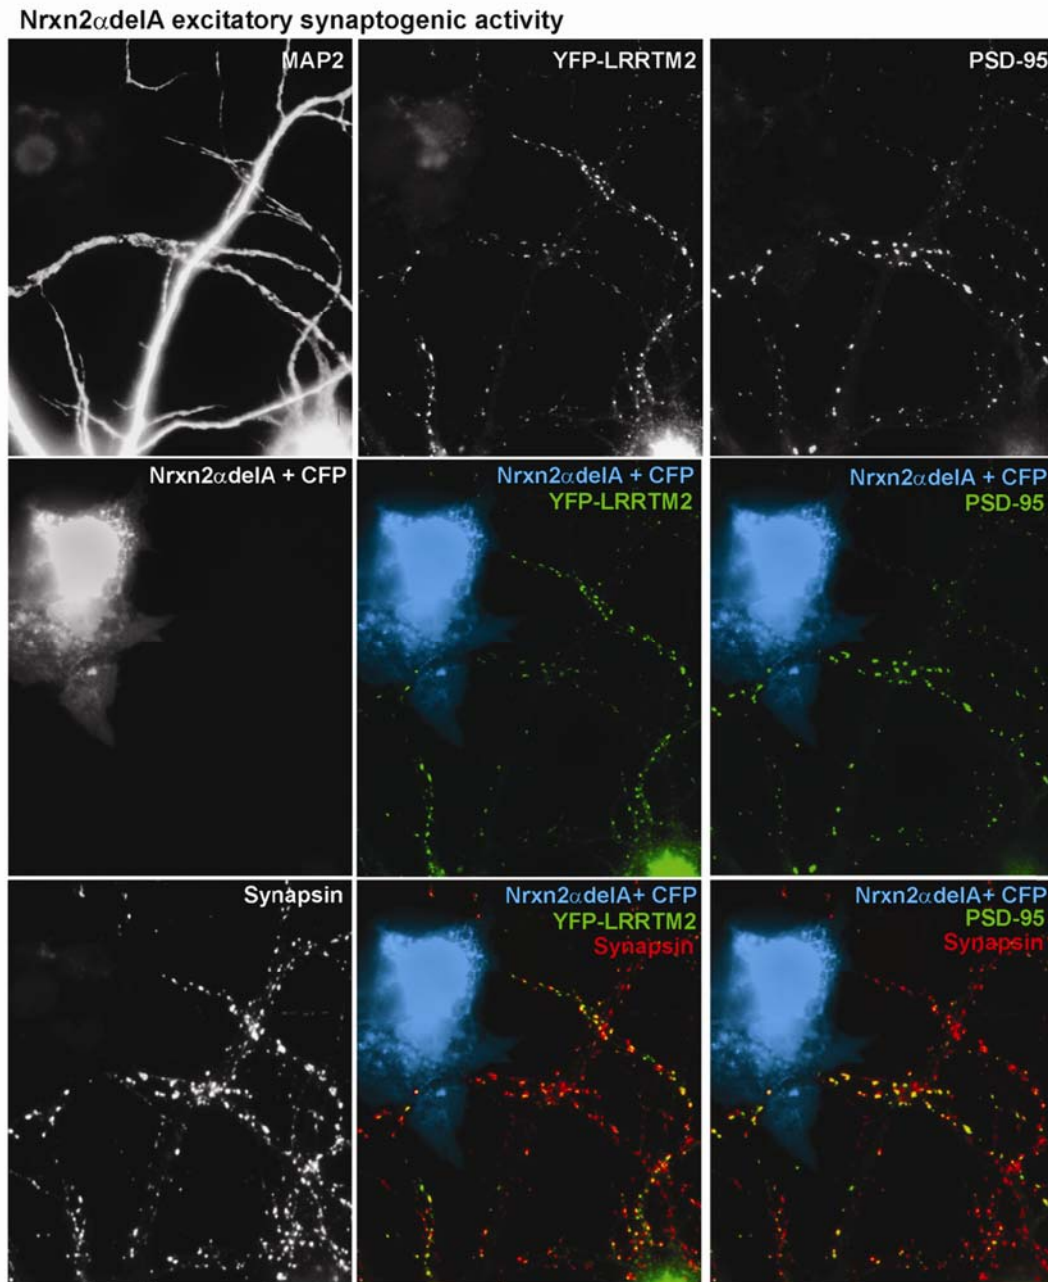

**Supplementary Figure 4.** NRXN2 c.2733delT (delA in mouse) results in functional deficiency in excitatory synaptogenic activity in neuron coculture assays. COS cells were transfected with neurexin2 $\alpha$ -CFP delA mutant and CFP to mark the transfected cells and cocultured with rat hippocampal neurons transfected with YFP-LRRTM2. In contrast to neurexin2 $\alpha$ -CFP wild type (Supp. Figure 3), the delA mutant essentially failed to induce clustering of YFP-LRRTM2 or PSD-95 at contact sites with transfected dendrites. Only synapsin-positive clusters of YFP-LRRTM2 and PSD-95 were seen corresponding to endogenous synapses.

## Supplementary Figure 5

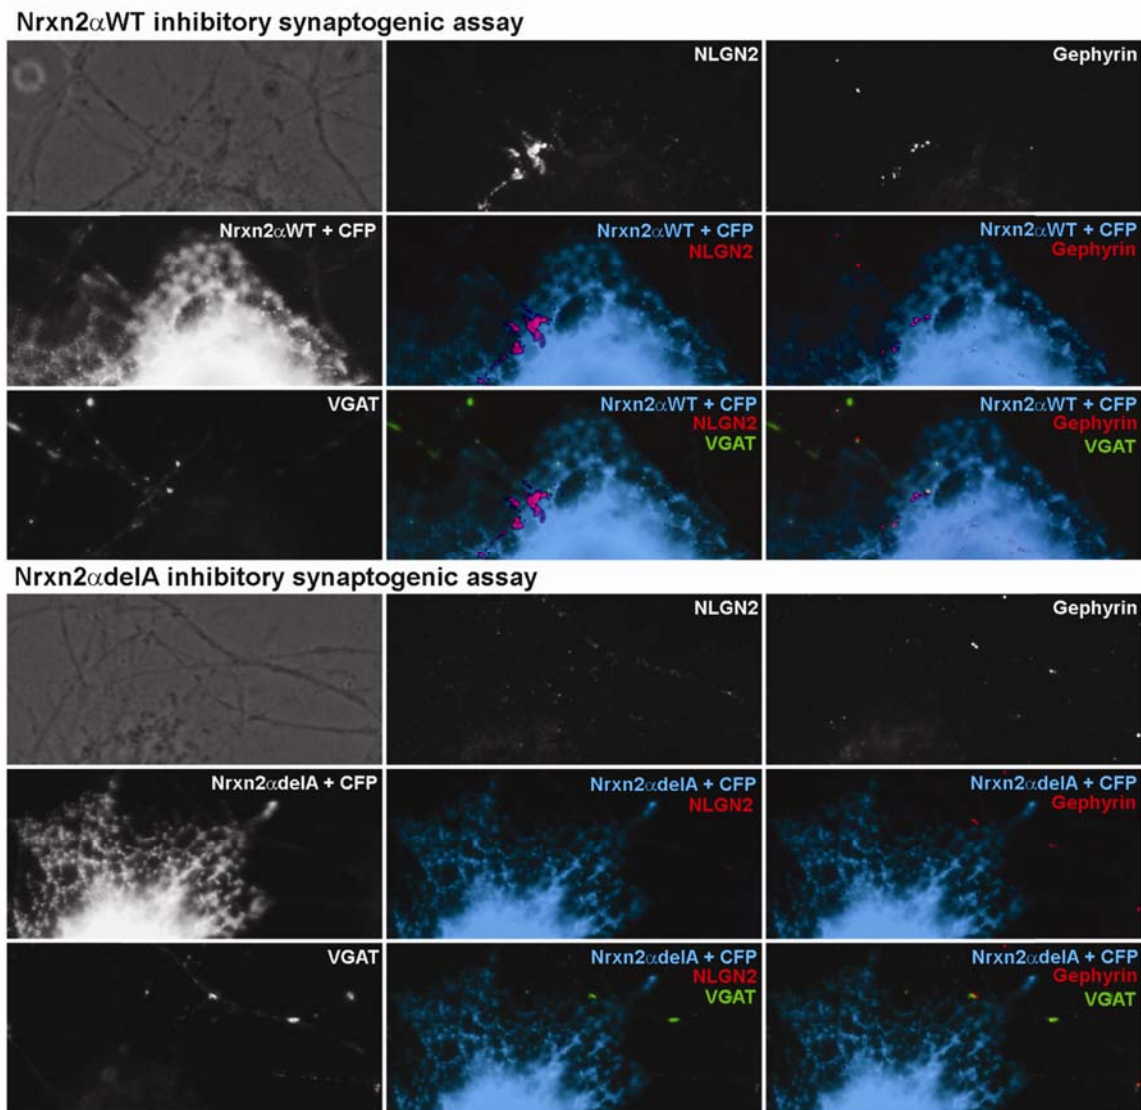

**Supplementary Figure 5.** NRXN2 c.2733delT (delA in mouse) results in functional deficiency in inhibitory synaptogenic activity in neuron coculture assays. CFP-positive cells cotransfected for neurexin2 $\alpha$ -CFP wild type (**top**) and cocultured with hippocampal neurons induced clustering of endogenous NLGN2 and gephyrin at contact sites with neuron processes. Induced clusters were distinguished from endogenous synapses by the absence of VGAT. In contrast, the delA mutant (**bottom**) failed to induce clustering of either GABAergic postsynaptic component. Only VGAT-positive clusters of NLGN2 and gephyrin were seen corresponding to endogenous synapses.

**Supplementary Table 1.** Primers used to amplify the exons/intronic junctions of *NRXN1*, *NRXN2*, and *NRXN3*

| Primer pair Name | Gene  | Target RefSeqs | Strand | Exons | Chr | Hg18 Positions F-R) | Forward Primers - F         | Reverse Primers -R           | Amplicon Size (bp) |
|------------------|-------|----------------|--------|-------|-----|---------------------|-----------------------------|------------------------------|--------------------|
| G00002_023       | NRXN1 | NM_138735      | +      | 1     | 2   | 50427250-50427503   | GCCTTAGGAGCCCAGGAGCG        | GCCTGGCCCTGCTTTGGATA         | 254                |
| G00002_034       | NRXN1 | BX647616       | -      | 1     | 2   | 50054725-50054536   | TTTCAGAGGATGGACTAAATTTCC    | GCTTCTGGTATCTTAAACCCTGC      | 190                |
| G00002_037       | NRXN1 | NM_138735      | -      | 1     | 2   | 50427751-50427182   | GAGAAGACTGTCCGAAGGAGG       | AGAGATAAGTGGCTCGCACC         | 570                |
| G00002_001       | NRXN1 | NM_004801      | +      | 2     | 2   | 51108292-51108876   | CGGCTCATCGTCCAGCTTCA        | CTGTGCCTCTCGTGCTGCT          | 585                |
| G00002_002       | NRXN1 | NM_004801      | +      | 2     | 2   | 51108021-51108486   | TTCCCTCGAAGCGAACTGCC        | CGCAGGGACATGACGGTGTT         | 466                |
| G00002_050       | NRXN1 | NM_004801      | -      | 2     | 2   | 51108643-51108057   | CAGCTTCTCCATCTTCTGCG        | TAGGAAGACCCCATGCACC          | 587                |
| G00002_052       | NRXN1 | EF539882       | -      | 2.1   | 2   | 51109058-51108481   | GATAAAGGAGGGCACATCCC        | CCTGCGCTTGGACTTGAC           | 578                |
| G00002_049       | NRXN1 | NM_004801      | -      | 2.3   | 2   | 51108483-51108049   | AGGGACATGACGGTGTTGAG        | GCCAAGATTAGGAAGACCCC         | 435                |
| G00002_003       | NRXN1 | NM_004801      | +      | 3     | 2   | 51006404-51006783   | TTGGGATGGCAGGGTTGAGA        | ATGCTGCCAATGGGAGGGAA         | 380                |
| G00002_051       | NRXN1 | EF539882       | -      | 3     | 2   | 51107233-51106887   | CGGCTAATGACATTTATCTGGG      | CATTTAGCCACAAATGCC           | 347                |
| G00002_004       | NRXN1 | NM_004801      | +      | 4     | 2   | 51002956-51003500   | CAGCAACTTCTGATGGTTCTCGG     | CCAAAGCATTCCAACCAGGG         | 545                |
| G00002_036       | NRXN1 | BC046631       | -      | 5     | 2   | 51001229-51000911   | GATGGCATAGAGGGAAGAATA       | ACACATGCCAACAGAAAACA         | 319                |
| G00002_048       | NRXN1 | NM_004801      | -      | 5     | 2   | 50711989-50711668   | GTCCTGGGTCTCCTTTTGAA        | TTATCTTATTTGCCACGAACTGT      | 322                |
| G00002_006       | NRXN1 | NM_004801      | +      | 6     | 2   | 50703761-50704330   | GCCTTTGGGCTCCAGAACT         | TGTTTTCTGTTAAGACCTGCTGATTTGC | 570                |
| G00002_007       | NRXN1 | NM_004801      | +      | 7     | 2   | 50701552-50702127   | CTGGCTGAGCTGCGGTCCT         | CCTCTGTGGGAGGCTACTTGTT       | 576                |
| G00002_008       | NRXN1 | NM_004801      | +      | 8     | 2   | 50700578-50701110   | CGGGTCTTCAGCAAAGGTGC        | TTGCAGTAGGGATGATGCTGACA      | 533                |
| G00002_009       | NRXN1 | NM_004801      | +      | 9     | 2   | 50633382-50633820   | TCATCTGTGGGTGCTTGGA         | TTTATTTGCCTGAGAAATGTTGCCTT   | 439                |
| G00002_010       | NRXN1 | NM_004801      | +      | 9     | 2   | 50633068-50633600   | TCTTTCATGGTGTGAAACAGAAGCA   | TGAAGATCCATGGAGTGGTGGC       | 533                |
| G00002_011       | NRXN1 | NM_004801      | +      | 10    | 2   | 50619097-50619565   | CAAATCCCTGATGCAGCCCA        | TGCATTGACTGAACTGTTGAGGC      | 469                |
| G00002_012       | NRXN1 | NM_004801      | +      | 10    | 2   | 50618754-50619308   | CAGGTATGGCTGCTCAGCTTGC      | GACCTGTGCATTCTCCTCTTTGA      | 555                |
| G00002_013       | NRXN1 | NM_004801      | +      | 11    | 2   | 50611902-50612460   | CTAGCTCCAGGCGGAGGGTG        | CCACAACCTCGCTGGTGTTC         | 559                |
| G00002_014       | NRXN1 | NM_004801      | +      | 11    | 2   | 50611611-50612119   | CCTCACTGACAGACATGGCCTCT     | TGCGCTATACCATCCAAGAATTATCA   | 509                |
| G00002_015       | NRXN1 | NM_004801      | +      | 12    | 2   | 50609069-50609589   | GGAAGTGCAGTGGGAAAGTCTTCA    | TGCAGCCAGTCTAAGCCAAACA       | 521                |
| G00002_016       | NRXN1 | NM_004801      | +      | 13    | 2   | 50586843-50587442   | TGCAATATTTGATGAGGCACCAAGA   | AATTGGTCCAGCCCGCTCT          | 600                |
| G00002_017       | NRXN1 | NM_004801      | +      | 14    | 2   | 50578121-50578717   | GGTCTTGAAGGTGACAGGATCTGC    | GCGTCTCTGTGCACTCTCCC         | 597                |
| G00002_018       | NRXN1 | NM_004801      | +      | 14    | 2   | 50577847-50578350   | TTTGTCTCCACCTGCTCCG         | TGGCAGGTGATCATACTAGGCTGG     | 504                |
| G00002_035       | NRXN1 | AB011150       | -      | 14    | 2   | 50135853-50135382   | ATGAATGAATGACAAGTCTGAAAC    | GGTAAGATTATTAACAGCTGGTACG    | 472                |
| G00002_019       | NRXN1 | NM_004801      | +      | 15    | 2   | 50576499-50577029   | GAGACCGTGTGGTGAAGGC         | GGGAGCGCGTGGTGAAGAT          | 531                |
| G00002_020       | NRXN1 | NM_004801      | +      | 15    | 2   | 50576386-50576714   | GGGAGCAGAGGCTTGTGTGTTG      | TGGGAAATGGTCTAACCTCATCA      | 329                |
| G00002_021       | NRXN1 | NM_004801      | +      | 16    | 2   | 50552829-50553372   | CCAAATTGGGTATTTGACCAGTTATCA | GCCCACATTCCTTCAATTTGACC      | 544                |
| G00002_022       | NRXN1 | NM_004801      | +      | 17    | 2   | 50545877-50546365   | CCAAAGAATCACCATCATCACAGGA   | CAGCCTCTCAGTTCCTAATTCAGGTG   | 489                |

|            |       |           |   |      |    |                   |                             |                             |     |
|------------|-------|-----------|---|------|----|-------------------|-----------------------------|-----------------------------|-----|
| G00002_024 | NRXN1 | NM_004801 | + | 18   | 2  | 50317237-50317777 | GTTTGCATTGTAAAGAACGCGATTAAC | CAACTTGGTCCACTTTCTTGAGCA    | 541 |
| G00002_025 | NRXN1 | NM_004801 | + | 19   | 2  | 50171647-50172243 | TCCTTTGTTTAAATGCAAGGATCCAG  | GCAGCTGTTGTCCAAAGCACA       | 597 |
| G00002_026 | NRXN1 | NM_004801 | + | 20   | 2  | 50134009-50134410 | TTGCATGGCAGTGGCTGTTG        | GCCAATAATTATGCATTTTCATGGACA | 402 |
| G00002_027 | NRXN1 | NM_004801 | + | 20   | 2  | 50133639-50134233 | AGCTTGGGCCAGAGGAGGGT        | GGGCGTCAGCTCACAATCTTCA      | 595 |
| G00002_028 | NRXN1 | NM_004801 | + | 21   | 2  | 50024110-50024663 | CCCTGTGTGCTATACCCACTGCT     | TGGCTGTACCACTTTCTGCG        | 554 |
| G00002_029 | NRXN1 | NM_004801 | + | 22   | 2  | 50002635-50003046 | TTCGCACTGCTGGGTTGTTTC       | CCATGAGGCAAAGGGATGGC        | 412 |
| G00002_030 | NRXN1 | NM_004801 | + | 22   | 2  | 50002285-50002877 | TGCGTGCGGTCATCACTGTC        | AGGCGGCAGAGAGCCGTATC        | 593 |
|            |       |           |   |      |    |                   |                             |                             |     |
| G00437_025 | NRXN2 | NM_138734 | - | 1    | 11 | 64166980-64166462 | TGGTTTACCTCCGCTTCATC        | AAAGCAGAGGGGCCAGG           | 519 |
| G00437_002 | NRXN2 | NM_015080 | - | 3    | 11 | 64237450-64236928 | ACGCTGCAGCTGGACAC           | CAGGAGCCACACACACTC          | 523 |
| G00437_003 | NRXN2 | NM_015080 | - | 4    | 11 | 64221915-64221730 | CGTGGTACCTTTGCTAACAGC       | AAAGGGAGTCTTGGGTAGC         | 186 |
| G00437_004 | NRXN2 | NM_015080 | - | 5    | 11 | 64217027-64216777 | TGGCTGATTTTGTACTCG          | GTGTCAGGACAGGTGGAGG         | 251 |
| G00437_005 | NRXN2 | NM_015080 | - | 6    | 11 | 64214598-64214358 | CTTCATCCCCTCAAGGCTG         | ATGTGCCTGCGTTGACTTG         | 241 |
| G00437_006 | NRXN2 | NM_015080 | - | 7    | 11 | 64210068-64209601 | GAGGGGAGAGGGAAGCAC          | TCCCTCCACCACAAGCTC          | 468 |
| G00437_007 | NRXN2 | NM_015080 | - | 8    | 11 | 64201215-64200967 | TCCTCGTTCCTTGAGTTTCAC       | CAAAGAGGGGAGAATCGAACAG      | 249 |
| G00437_008 | NRXN2 | NM_015080 | - | 9    | 11 | 64192727-64192396 | GCCTAGCCGTAGCTCTTCC         | GACCCAGACAAGTACCCAGG        | 332 |
| G00437_009 | NRXN2 | NM_015080 | - | 10   | 11 | 64191808-64191201 | CTGCTGGGTGGGAGTGG           | GGTGTAGAAGAGACCCGCTG        | 608 |
| G00437_010 | NRXN2 | NM_015080 | - | 11   | 11 | 64185301-64184714 | CTGCAGGGCACAAGGTG           | GCACAGGGATGGAAAGTAGG        | 588 |
| G00437_011 | NRXN2 | NM_015080 | - | 12   | 11 | 64184675-64184302 | GGCTTTTCGCCCTTGTAAATG       | GCTTCTCCAGACAGAGGCAG        | 374 |
| G00437_012 | NRXN2 | NM_015080 | - | 13   | 11 | 64177864-64177674 | AGACACCCTCCCTGTGAAG         | CTCCCTAAATCCAGCGTC          | 191 |
| G00437_013 | NRXN2 | NM_015080 | - | 14   | 11 | 64176290-64176001 | GGGAGGCTGTCTGTGTATCC        | CCAGGCAGTAGTACCAAGTAG       | 290 |
| G00437_014 | NRXN2 | NM_015080 | - | 15   | 11 | 64175771-64175227 | CTCCTGTGGAGGGGAGG           | GCCAGGAGAGCTGTATGTGG        | 545 |
| G00437_015 | NRXN2 | NM_015080 | - | 16   | 11 | 64174765-64174420 | CAGCCATAGCTCCTCCTCAC        | CAGGAATGGGGTGTACTCG         | 346 |
| G00437_016 | NRXN2 | NM_015080 | - | 17   | 11 | 64173031-64172691 | ACCTGACAGCCAGATGCC          | CAGAGCAAAGGCTACCTGC         | 341 |
| G00437_017 | NRXN2 | NM_015080 | - | 18   | 11 | 64172459-64172176 | AAGCTTCCACACCTCCTGG         | CTCAGAGGCCCTGTTTCCTC        | 284 |
| G00437_018 | NRXN2 | NM_015080 | - | 19   | 11 | 64159576-64159226 | GTCACAACCCTGAGGACCTG        | AGACTTGAGGTGCTGATCCC        | 351 |
| G00437_019 | NRXN2 | NM_015080 | - | 20   | 11 | 64154712-64154378 | GAGCTGGGCTAGTGGTGGTC        | GCGGCCGACTCCTATC            | 335 |
| G00437_020 | NRXN2 | NM_015080 | - | 21   | 11 | 64150715-64150415 | CTTTCGTGGATGTTGCTG          | ATTGGTGAAGGCACGGAG          | 301 |
| G00437_021 | NRXN2 | NM_015080 | - | 22   | 11 | 64147224-64146729 | CCTCTTCTCCTTGGC             | TGTGGCTATGCAGATATCAACC      | 496 |
| G00437_022 | NRXN2 | NM_015080 | - | 23   | 11 | 64144495-64144262 | ACCTCAAGTGGCAGCTGTG         | CCAGGTGGCAGGGACAG           | 234 |
| G00437_023 | NRXN2 | NM_015080 | - | 24.1 | 11 | 64132234-64131615 | AACCGATTTGGGTGTGTGAG        | GCTCAAAGGACGTGGGG           | 620 |
| G00437_024 | NRXN2 | NM_015080 | - | 24.2 | 11 | 64131774-64131141 | AACCTCAGGACAGATGGGG         | AGCCAGGGAGAGGGTCC           | 634 |
|            |       |           |   |      |    |                   |                             |                             |     |
| G00438_020 | NRXN3 | AK310235  | + | 1    | 14 | 78150930-78151290 | GGCCCTTATGATGCAATTTAG       | GGACCTAATGAGATAAAAAGTTCAATG | 361 |
| G00438_021 | NRXN3 | AK310235  | + | 2    | 14 | 78181031-78181727 | TCACCCTGCTGCTAGTTTC         | CAAGCACAGAGAGAGAATTGAAG     | 697 |
| G00438_001 | NRXN3 | NM_004796 | + | 3    | 14 | 78187243-78187514 | CCTATGTCCTCCACCAGG          | TGAGGACAGATCCAGTCATTG       | 272 |



|            |       |              |   |     |    |                   |                             |                           |     |
|------------|-------|--------------|---|-----|----|-------------------|-----------------------------|---------------------------|-----|
| G00438_002 | NRXN3 | NM_004796    | + | 4   | 14 | 78245242-78245849 | GCCCAGTGAGTGATGGATG         | GCATGCAAGGGTGAAAATTAAG    | 608 |
| G00438_017 | NRXN3 | NM_001105250 | + | 4   | 14 | 79229134-79229471 | AACTCCACCTCTACTAAAGATAAATTG | AACAGTCATTTATGCAGCAGG     | 338 |
| G00438_003 | NRXN3 | NM_004796    | + | 5   | 14 | 78250772-78251307 | GCTCAGCACTCACCTGTTAGG       | CTGCCAGGGATCCAAC          | 536 |
| G00438_004 | NRXN3 | NM_004796    | + | 6   | 14 | 78339638-78339996 | CTTAGCCTGAAAGCAAAGGG        | CAATCAAACCAATGAAAATCAG    | 359 |
| G00438_018 | NRXN3 | AK056530     | + | 6   | 14 | 79396958-79397685 | TTGGGTGGCAAGAGGCATACAGA     | AGTGGGCAACGGAAGCAAGACTAT  | 728 |
| G00438_005 | NRXN3 | NM_004796    | + | 7   | 14 | 78346296-78346565 | ATGGCCACATTTCTTACGTG        | CCCCACTCCATTGTTAAAAG      | 270 |
| G00438_006 | NRXN3 | NM_004796    | + | 8   | 14 | 78493227-78493611 | AATTCCTTGAATGCTGCTGG        | GACCTTCTTAGCCTTGCCTG      | 385 |
| G00438_007 | NRXN3 | NM_004796    | + | 9   | 14 | 78502027-78502617 | TGTGGAAACAGGTTACACCC        | TGTCAGGAATGGAGGGTAGG      | 591 |
| G00438_008 | NRXN3 | NM_004796    | + | 10  | 14 | 78503209-78503569 | GGGATTTGAAGCCCACTATG        | TGGTTTGCCTCTGGAATAG       | 361 |
| G00438_009 | NRXN3 | NM_004796    | + | 11  | 14 | 78504181-78504512 | TGATGAATTATCTCAAGTGATCAAAC  | GGCAGAGGCAGCAAAGAG        | 332 |
| G00438_010 | NRXN3 | NM_004796    | + | 12  | 14 | 78524027-78524334 | GGTAAATTCAGGTGATTTCTTG      | TTTCAGAAGAGCCATCCTTTTAC   | 308 |
| G00438_011 | NRXN3 | NM_004796    | + | 13  | 14 | 79003217-79003612 | TCCTCTGCAGCTGTTCTG          | ATAAGCATGTGCACCTTTGC      | 396 |
| G00438_012 | NRXN3 | NM_004796    | + | 14  | 14 | 79199802-79200143 | GGAGGATCAAGTTTAAAGGGAG      | TGTTCTGGAATTTGGTGACAG     | 342 |
| G00438_013 | NRXN3 | NM_004796    | + | 15  | 14 | 79233654-79234119 | CCATTCAGACCAGGTAAGGC        | TCTTTAGCTACATAAAGCAATGACC | 466 |
| G00438_014 | NRXN3 | NM_004796    | + | 16  | 14 | 79341092-79341476 | AATGATGGGAGATGGGACAC        | CCATGGGATTTGATGCTTTC      | 385 |
| G00438_015 | NRXN3 | NM_004796    | + | 17  | 14 | 79397662-79398133 | ATAGTCTTGCTCCGTTGCC         | CTCACCGTCCAAAGATTCATAG    | 472 |
| G00438_016 | NRXN3 | NM_001105250 | + | 1.3 | 14 | 78817152-78817704 | AAATTCAGCTCCGGGAAAG         | CTACCTGCAAGGCTAGTGGG      | 553 |

**Supplementary Table 1.** Non-synonymous variants identified in *NRXN1*, *NRXN2* and *NRXN3* in patients and control cohorts

| Gene  | Amino Acid Change | Isoform                    | DNA change            | Variant Type | Genomic position <sup>b</sup> | Target Exon | dbSNP | Transmission | Occurrence  |             |            |                  |                           |                                | Panther <sup>d</sup> | Sift <sup>d</sup> | PolyPhen <sup>d</sup> |
|-------|-------------------|----------------------------|-----------------------|--------------|-------------------------------|-------------|-------|--------------|-------------|-------------|------------|------------------|---------------------------|--------------------------------|----------------------|-------------------|-----------------------|
|       |                   |                            |                       |              |                               |             |       |              | ASD (n=142) | SCZ (n=143) | NSID(n=94) | Controls (n=190) | Feng et al. ASD (n = 264) | Feng et al. Controls (n = 729) |                      |                   |                       |
| NRXN1 | p.T60S            | NM_004801.4<br>NP_004792.1 | c.179C>G              | Missense     | Chr2: 51108737                | 2           | -     | Father       | 0           | 0           | 1          | 0                | -                         | -                              | NA                   | 0.03              | 1.72                  |
| NRXN1 | p.T84R            | NM_004801.4<br>NP_004792.1 | c.251C>G              | Missense     | Chr2: 51108665                | 2           | -     | Father       | 0           | 0           | 0          | 1                | -                         | -                              | NA                   | 0.17              | 0.38                  |
| NRXN1 | p.R88G            | NM_004801.4<br>NP_004792.1 | c.262C>G              | Missense     | Chr2: 51108654                | 2           | -     | Mother       | 0           | 0           | 0          | 1                | -                         | -                              | NA                   | 0.11              | 2.08                  |
| NRXN1 | p.I95V            | NM_004801.4<br>NP_004792.1 | c.283A>G              | Missense     | Chr2: 51108633                | 2           | -     | Mother       | 0           | 0           | 1          | 0                | -                         | -                              | NA                   | 0.49              | 0.63                  |
| NRXN1 | p.P208A           | NM_004801.4<br>NP_004792.1 | c.622C>G              | Missense     | Chr2: 51108294                | 2           | -     | Father       | 1           | 0           | 0          | 0                | -                         | -                              | NA                   | 1.00              | 1.93                  |
| NRXN1 | p.A219_E221del    | NM_004801.4<br>NP_004792.1 | c.656delCGGG<br>CGAGG | Deletion     | Chr2: 51108252                | 2           | -     | Father       | 0           | 0           | 1          | 0                | -                         | -                              | NA                   | NA                | NA                    |
| NRXN1 | p.D392H           | NM_004801.4<br>NP_004792.1 | c.1174G>C             | Missense     | Chr2: 50700810                | 8           | -     | Father       | 0           | 1           | 0          | 1                | -                         | -                              | -5.98                | 0.00              | 2.30                  |
| NRXN1 | p.P429S           | NM_004801.4<br>NP_004792.1 | c.1285C>T             | Missense     | Chr2: 50700699                | 8           | -     | *            | 2           | 2           | 1          | 0                | -                         | -                              | -5.17                | 0.61              | 2.09                  |
| NRXN1 | p.I649V           | NM_004801.4<br>NP_004792.1 | c.1945A>G             | Missense     | Chr2: 50619093                | 10          | -     | Mother       | 0           | 1           | 0          | 0                | -                         | -                              | -5.11                | 0.50              | 0.63                  |
| NRXN1 | p.G667E           | NM_004801.4<br>NP_004792.1 | c.2000G>A             | Missense     | Chr2: 50619038                | 10          | -     | Mother       | 1           | 0           | 0          | 0                | -                         | -                              | -3.88                | 0.23              | 1.55                  |
| NRXN1 | p.L708I           | NM_004801.4<br>NP_004792.1 | c.2122C>A             | Missense     | Chr2: 50618916                | 10          | -     | n.d          | 2           | 5           | 1          | 3                | -                         | -                              | -4.32                | 0.40              | 1.11                  |

|       |                      |                              |                           |           |                |    |                |         |    |    |    |    |                |     |       |      |      |
|-------|----------------------|------------------------------|---------------------------|-----------|----------------|----|----------------|---------|----|----|----|----|----------------|-----|-------|------|------|
| NRXN1 | p.R813C              | NM_004801.4<br>NP_004792.1   | c.2437C>T                 | Missense  | Chr2: 50587197 | 13 | -              | n.d.    | 0  | 0  | 1  | 0  | -              | -   | -8.09 | 0.04 | 2.51 |
| NRXN1 | p.L869M              | NM_004801.4<br>NP_004792.1   | c.2605C>A                 | Missense  | Chr2: 50578249 | 14 | -              | *       | 1  | 1  | 0  | 0  | -              | -   | -5.44 | 0.34 | 0.52 |
| NRXN1 | p.G17V               | NM_138735.2<br>NP_620072.1   | c.50G>T                   | Missense  | Chr2: 50427542 | 1  | rs1341320<br>5 | n.d.    | 21 | 17 | 13 | 30 | >24            | >24 | NA    | 0.00 | 2.02 |
| NRXN1 | p.S14L               | NM_138735.2<br>NP_620072.1   | c.41C>T                   | Missense  | Chr2: 50427551 | 1  | -              | Mother  | 1  | 0  | 0  | 0  | 3              | 0   | NA    | 0.00 | 1.35 |
| NRXN1 | p.G26del             | NM_138735.2<br>NP_620072.1   | c.64delGGC                | Deletion  | Chr2: 50427516 | 1  | In repeat      | n.d.    | 0  | 0  | 0  | 1  | -              | -   | NA    | NA   | NA   |
| NRXN1 | p.G26_A27insGGG<br>G | NM_138735.2<br>NP_620072.1   | c.64insGGC <sub>(4)</sub> | Insertion | Chr2: 50427516 | 1  | In repeat      | n.d.    | 0  | 0  | 0  | 1  | 0              | 0   | NA    | NA   | NA   |
| NRXN1 | p.G26_A27insG        | NM_138735.2<br>NP_620072.1   | c.64insGGC                | Insertion | Chr2: 50427516 | 1  | In repeat      | n.d.    | 0  | 2  | 1  | 0  | 2              | 3   | NA    | NA   | NA   |
| NRXN1 | p.G26_A27insGG       | NM_138735.2<br>NP_620072.1   | c.64insGGC <sub>(2)</sub> | Insertion | Chr2: 50427516 | 1  | In repeat      | n.d.    | 1  | 0  | 1  | 0  | 1              | 0   | NA    | NA   | NA   |
| NRXN1 | p.G22_G26del         | NM_138735.2<br>NP_620072.1   | c.64delGGC <sub>(5)</sub> | Deletion  | Chr2: 50427528 | 1  | In repeat      | n.d.    | 1  | 1  | 0  | 1  | 6 <sup>a</sup> | 11  | NA    | NA   | NA   |
| NRXN1 | p.I1234M             | NM_004801.4  <br>NP_004792.1 | c.3702C>G                 | Missense  | Chr2: 50171981 | 19 | -              | *       | 1  | 0  | 1  | 0  | -              | -   | -5.58 | 0.11 | 1.45 |
| NRXN1 | p.G1402fs            | NM_004801.4<br>NP_004792.1   | c.4205insACG<br>G         | Insertion | Chr2: 50002815 | 22 | -              | de novo | 0  | 1  | 0  | 0  | -              | -   | NA    | NA   | NA   |
| NRXN1 | p.H1434R             | NM_004801.4<br>NP_004792.1   | c.4301A>G                 | Missense  | Chr2: 50002719 | 22 | -              | Mother  | 0  | 1  | 0  | 0  | -              | -   | -6.25 | 0.14 | 2.06 |
| NRXN2 | p.P1696H             | NM_015080.3<br>NP_055895.1   | c.5087C>A                 | MISSENSE  | chr11:64131296 | 23 | -              | Mother  | 0  | 0  | 1  | 0  | -              | -   | -5.99 | 0.09 | 1.69 |
| NRXN2 | p.F1118L             | NM_015080.3<br>NP_055895.1   | c.3352T>C                 | MISSENSE  | chr11:64172318 | 17 |                | n.d.    | 0  | 0  | 0  | 1  |                |     | ND    | ND   | ND   |

|              |                 |                                    |                   |                 |                       |    |   |               |          |          |          |          |   |   |           |           |           |
|--------------|-----------------|------------------------------------|-------------------|-----------------|-----------------------|----|---|---------------|----------|----------|----------|----------|---|---|-----------|-----------|-----------|
| NRXN2        | p.H1084Y        | NM_015080.3<br>NP_055895.1         | c.3250C>T         | MISSENSE        | chr11:64172815        | 16 | - | n.d.          | 1        | 1        | 0        | 0        | - | - | -6.52     | 1.00      | 1.89      |
| NRXN2        | p.D1081N        | NM_015080.3<br>NP_055895.1         | c.3241G>A         | MISSENSE        | chr11:64172824        | 16 | - | Mother        | 0        | 1        | 0        | 0        | - | - | -4.78     | 0.20      | 1.70      |
| NRXN2        | p.R1031G        | NM_015080.3<br>NP_055895.1         | c.3091C>G         | MISSENSE        | chr11:64174514        | 15 | - | Mother        | 1        | 0        | 0        | 0        | - | - | NA        | 0.32      | 2.17      |
| <b>NRXN2</b> | <b>p.P911fs</b> | <b>NM_138732.2<br/>NP_620060.1</b> | <b>c.2733delT</b> | <b>deletion</b> | <b>chr11:64175368</b> | 12 | - | <b>Father</b> | <b>1</b> | <b>0</b> | <b>0</b> | <b>0</b> | - | - | <b>NA</b> | <b>NA</b> | <b>NA</b> |
| NRXN2        | p.V846M         | NM_138732.2<br>NP_620060.1         | c.2536G>A         | MISSENSE        | chr11:64175565        | 12 | - | n.d.          | 1        | 1        | 0        | 1        | - | - | -3.72     | 0.23      | 1.07      |
| NRXN2        | p.A814V         | NM_015080.3<br>NP_055895.1         | c.2441C>T         | MISSENSE        | chr11:64176178        | 13 | - | Mother        | 1        | 0        | 0        | 0        | - | - | -5.87     | 0.22      | 0.55      |
| NRXN2        | p.P805S         | NM_015080.3<br>NP_055895.1         | c.2413C>T         | MISSENSE        | chr11:64177747        | 12 | - | Father        | 1        | 0        | 0        | 0        | - | - | -4.70     | 0.83      | 0.08      |
| NRXN2        | p.V655A         | NM_015080.3<br>NP_055895.1         | c.1964T>C         | MISSENSE        | chr11:64185022        | 10 | - | Mother        | 1        | 0        | 0        | 0        | - | - | -4.77     | 0.34      | 1.61      |
| NRXN2        | p.G630S         | NM_015080.3<br>NP_055895.1         | c.1888G>A         | MISSENSE        | chr11:64185098        | 10 | - | Mother        | 0        | 1        | 0        | 0        | - | - | -5.74     | 0.01      | 1.82      |
| NRXN2        | p.V364I         | NM_015080.3<br>NP_055895.1         | c.1090G>A         | MISSENSE        | chr11:64209756        | 6  | - | *             | 1        | 0        | 1        | 1        | - | - | -4.07     | 0.39      | 1.07      |
| NRXN2        | p.G268V         | NM_015080.3<br>NP_055895.1         | c.803G>T          | MISSENSE        | chr11:64214500        | 5  | - | Mother        | 0        | 1        | 0        | 0        | - | - | NA        | 0.04      | 1.36      |
| NRXN2        | p.A200T         | NM_015080.3<br>NP_055895.1         | c.598G>A          | MISSENSE        | chr11:64237150        | 2  | - | Mother        | 0        | 1        | 0        | 0        | - | - | NA        | 0.58      | 0.68      |
| NRXN3        | p.R308S         | NM_004796.4<br>NP_004787.2         | c.924G>C          | MISSENSE        | chr14:78251234        | 5  | - | Mother        | 1        | 0        | 0        | -        | - | - | -4.64     | 0.51      | 2.02      |
| NRXN3        | p.I669L         | NM_004796.4<br>NP_004787.2         | c.2005A>C         | MISSENSE        | chr14:78504424        | 11 | - | Mother        | 1        | 0        | 0        | -        | - | - | -3.66     | 0.24      | 0.65      |

Gauthier et al.

|       |        |                            |          |          |                |   |   |        |   |   |   |   |   |   |       |      |      |
|-------|--------|----------------------------|----------|----------|----------------|---|---|--------|---|---|---|---|---|---|-------|------|------|
| NRXN3 | p.I42L | NM_004796.4<br>NP_004787.2 | c.124A>C | Missense | chr14:78245334 | 4 | - | Father | 0 | 1 | 0 | - | - | - | -4.01 | 1.00 | 0.26 |
|-------|--------|----------------------------|----------|----------|----------------|---|---|--------|---|---|---|---|---|---|-------|------|------|

Bold; variants tested functionally; n.d.; not determined; NA, not available<sup>a</sup>found in Afro-American and Controls only, <sup>b</sup>March 2006 Assembly, <sup>c</sup>According to NRXN1- $\alpha$ ; <sup>d</sup>Panther score  $\leq -3$  functional significance,  $> -3$  = neutral; SIFT score:  $< 0.05$  deleterious,  $\geq 0.05$  tolerated; Polyphen score:  $\geq 2.00$  probably damaging, 1.50-1.99 possibly damaging,  $< 1.50$  benign; \*transmitted from an unaffected parent.
